# Supplementary material
Source: publisher figshare collection journal article supplement (https://future-science-group.figshare.com/ndownloader/files/33791927)
Supplement: Supplementary file 1 [file 33791927]

**Supplementary Table 1**

| **Diagnosis Date** | **2010** | **2011** | **2012** | **2013** | **2014** | **2015** | **2016** | **2017** | **2018** | **Total** |
| --- | --- | --- | --- | --- | --- | --- | --- | --- | --- | --- |
| **Total** | 147 | 155 | 133 | 183 | 253 | 656 | 773 | 932 | 1291 | 4523 |
| **Female** | 13 | 8 | 11 | 15 | 25 | 69 | 106 | 126 | 149 | 522 |
| **Male** | 134 | 147 | 122 | 168 | 228 | 587 | 667 | 806 | 1142 | 4001 |
| **Biliary Dx - Total** | 0 | 0 | 1 | 4 | 3 | 31 | 48 | 68 | 105 | 260 |
| **Biliary Dx - Female** | 0 | 0 | 0 | 0 | 0 | 0 | 0 | 2 | 6 | 8 |
| **Biliary Dx - Male** | 0 | 0 | 1 | 4 | 3 | 31 | 48 | 66 | 99 | 252 |
| **Breast Dx - Total** | 9 | 7 | 4 | 9 | 13 | 41 | 70 | 83 | 104 | 340 |
| **Breast Dx - Female** | 9 | 5 | 4 | 7 | 13 | 35 | 61 | 75 | 89 | 298 |
| **Breast Dx - Male** | 0 | 2 | 0 | 2 | 0 | 6 | 9 | 8 | 15 | 42 |
| **Cervical Dx - Total** | 0 | 1 | 1 | 0 | 0 | 1 | 1 | 3 | 2 | 9 |
| **Cervical Dx - Female** | 0 | 1 | 0 | 0 | 0 | 1 | 1 | 3 | 2 | 8 |
| **Cervical Dx – Male*** | 0 | 0 | 1 | 0 | 0 | 0 | 0 | 0 | 0 | 1 |
| **Colorectal Dx - Total** | 54 | 62 | 63 | 95 | 137 | 309 | 324 | 379 | 569 | 1992 |
| **Colorectal Dx - Female** | 2 | 2 | 3 | 7 | 9 | 17 | 22 | 20 | 20 | 102 |
| **Colorectal Dx - Male** | 52 | 60 | 60 | 88 | 128 | 292 | 302 | 359 | 549 | 1890 |
| **Endometrial Dx - Total** | 0 | 0 | 1 | 1 | 3 | 9 | 11 | 14 | 13 | 52 |
| **Endometrial Dx - Female** | 0 | 0 | 1 | 1 | 3 | 9 | 11 | 14 | 13 | 52 |
| **Endometrial Dx - Male** | 0 | 0 | 0 | 0 | 0 | 0 | 0 | 0 | 0 | 0 |
| **Esophageal Dx - Total** | 1 | 1 | 1 | 2 | 5 | 22 | 30 | 50 | 92 | 204 |
| **Esophageal Dx - Female** | 0 | 0 | 0 | 0 | 0 | 0 | 0 | 2 | 3 | 5 |
| **Esophageal Dx - Male** | 1 | 1 | 1 | 2 | 5 | 22 | 30 | 48 | 89 | 199 |
| **Gastric Dx - Total** | 3 | 1 | 2 | 0 | 0 | 11 | 21 | 33 | 49 | 120 |
| **Gastric Dx - Female** | 0 | 0 | 0 | 0 | 0 | 0 | 1 | 2 | 2 | 5 |
| **Gastric Dx - Male** | 3 | 1 | 2 | 0 | 0 | 11 | 20 | 31 | 47 | 115 |
| **Ovarian Dx - Total** | 1 | 0 | 1 | 0 | 0 | 2 | 6 | 3 | 5 | 18 |
| **Ovarian Dx - Female** | 1 | 0 | 1 | 0 | 0 | 2 | 6 | 3 | 5 | 18 |
| **Ovarian Dx - Male** | 0 | 0 | 0 | 0 | 0 | 0 | 0 | 0 | 0 | 0 |
| **Pancreatic Dx - Total** | 1 | 0 | 3 | 1 | 7 | 16 | 25 | 48 | 81 | 182 |
| **Pancreatic Dx - Female** | 0 | 0 | 2 | 0 | 0 | 4 | 1 | 2 | 5 | 14 |
| **Pancreatic Dx - Male** | 1 | 0 | 1 | 1 | 7 | 12 | 24 | 46 | 76 | 168 |
| **Prostate Dx - Total** | 62 | 72 | 43 | 59 | 65 | 174 | 160 | 177 | 189 | 1001 |
| **Prostate Dx - Female** | 0 | 0 | 0 | 0 | 0 | 0 | 0 | 0 | 0 | 0 |
| **Prostate Dx - Male** | 62 | 72 | 43 | 59 | 65 | 174 | 160 | 177 | 189 | 1001 |
| **Renal Dx - Total** | 16 | 11 | 13 | 12 | 20 | 40 | 77 | 74 | 82 | 345 |
| **Renal Dx - Female** | 1 | 0 | 0 | 0 | 0 | 1 | 3 | 3 | 4 | 12 |
| **Renal Dx - Male** | 15 | 11 | 13 | 12 | 20 | 39 | 74 | 71 | 78 | 333 |

*Male patients with ICD codes for cervical cancer would not be reviewed; these patients have codes entered in error, are transgender, or some other exception
